# Supplementary material
Source: PubMed Central journal article supplement (PMC7667973)
Supplement: supp_RA120.013632_159778_2_supp_594751_qgmf8m.pdf [file supp_RA120.013632_159778_2_supp_594751_qgmf8m.pdf]

## **Supportive Information**

Cadmium-mediated lung injury is exacerbated by the persistence of classically activated macrophages

Jennifer L. Larson-Casey<sup>1,\*</sup>, Linlin Gu<sup>1</sup>, Oliver Fiehn<sup>2</sup>, and A. Brent Carter<sup>1,3</sup>

## Supporting Figures:

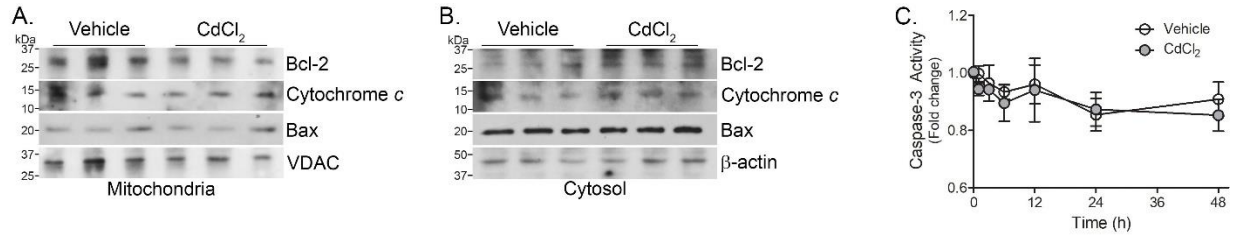

**Supportive Figure 1. Cadmium does not alter macrophage apoptosis.** Macrophages were exposed to vehicle or CdCl<sub>2</sub> (50μM, 3 h). Immunoblot analysis in isolated *A*, mitochondrial and *B*, cytosolic fractions. *C*, Caspase-3 activity in exposed macrophages. *n* = 3. Values shown as mean ± S.D.

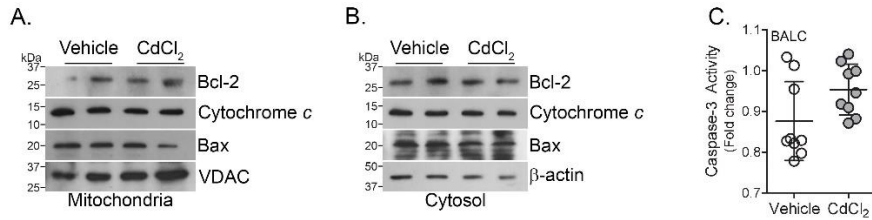

**Supportive Figure 2. Cadmium-exposed lung macrophages do not undergo apoptosis.** WT mice were exposed to vehicle or CdCl<sub>2</sub> (100 ng/kg, intratracheal). After 7 days, BAL was performed. Immunoblot analysis in isolated *A*, mitochondrial and *B*, cytosolic fractions. *C*, Caspase-3 activity in isolated lung macrophages. *n* = 9. Values shown as mean ± S.D.
